# Supplementary material
Source: publisher figshare collection journal article supplement (https://tandf.figshare.com/ndownloader/files/17632946)
Supplement: Supplementary file 1 [file 17632946]

**Suplemantary Data**

**Inhibitive effect of 4-Amino-N-benzylidene-benzamide Schiff Base on mild steel corrosion in HCl solution**

Ece Altunbaş Şahina,*, Fatih Tezcanb, Ramazan Solmazc, Gülfeza Kardaşb,*

aBingöl University, Genç Vocational School, Property Protection and Security Department, Civil Defense and Firefighting Program, 12000, Bingöl, Turkey

bÇukurova University, Science and Letters Faculty, Chemistry Department, 01330 Adana,Turkey,

cBingöl University, Faculty of Health Sciences, Occupational Health and Safety Department, 12000, Bingöl, Turkey

**Table S1.** Elemental analysis of 4-BAB

| Elements | Experiments (%) | Theoretiacal (%) |
| --- | --- | --- |
| C | 73.5 | 74.7 |
| N | 12.7 | 12.4 |
| H | 5.3 | 5.3 |
| O | 8.4 | 7.1 |


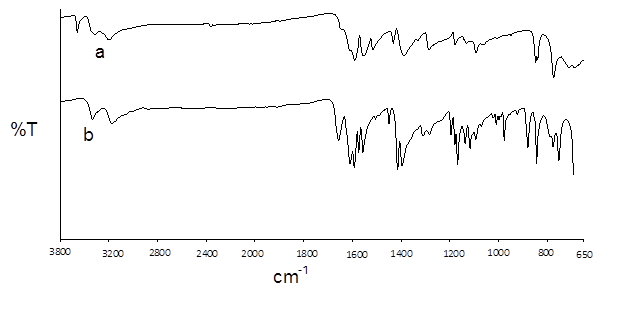


**Figure S1.** FT-IR spectrum of 4-AB (a) and 4-BAB (b)


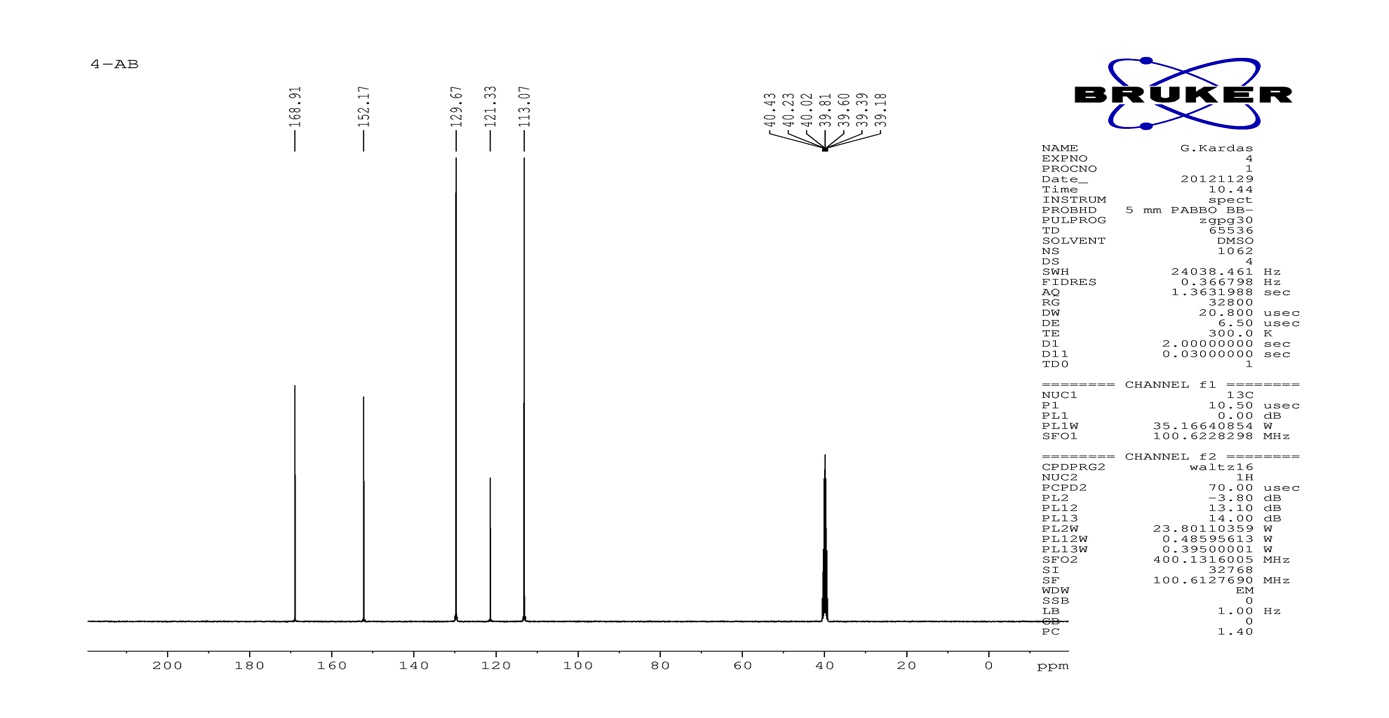


a

ppm


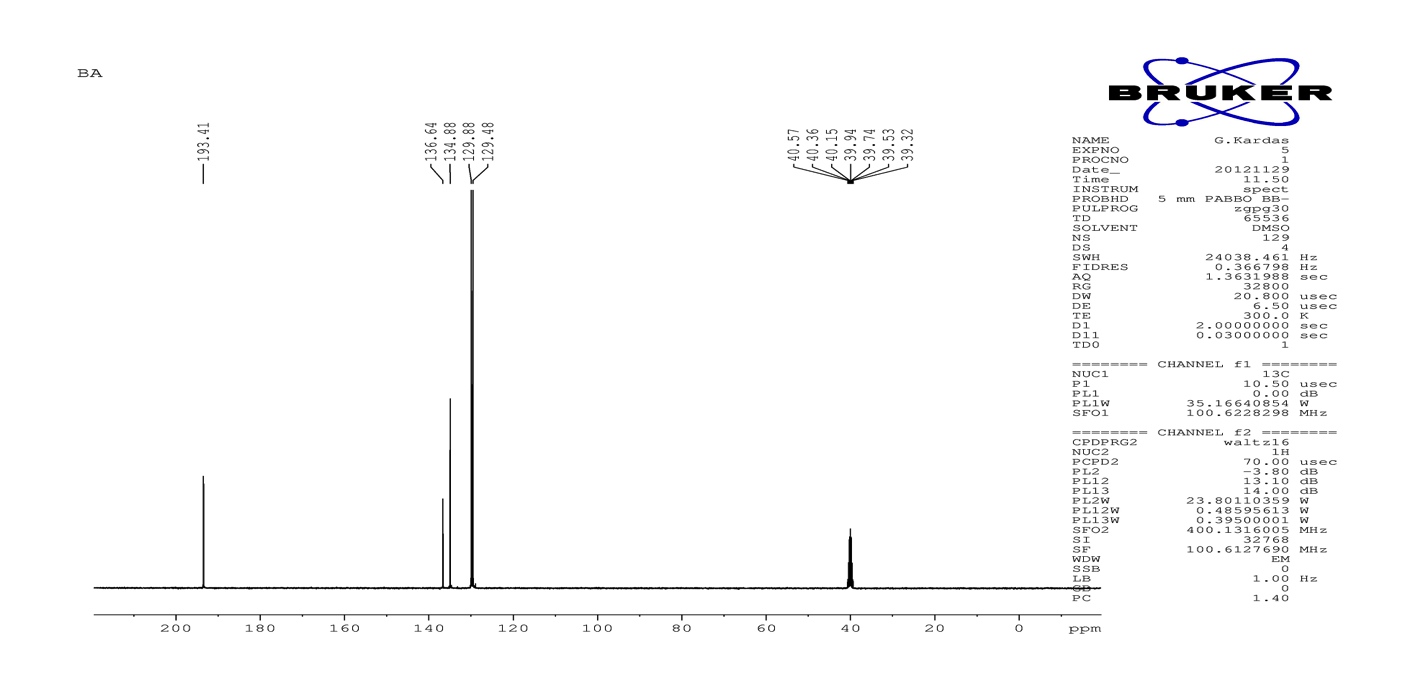


b

ppm

ppm


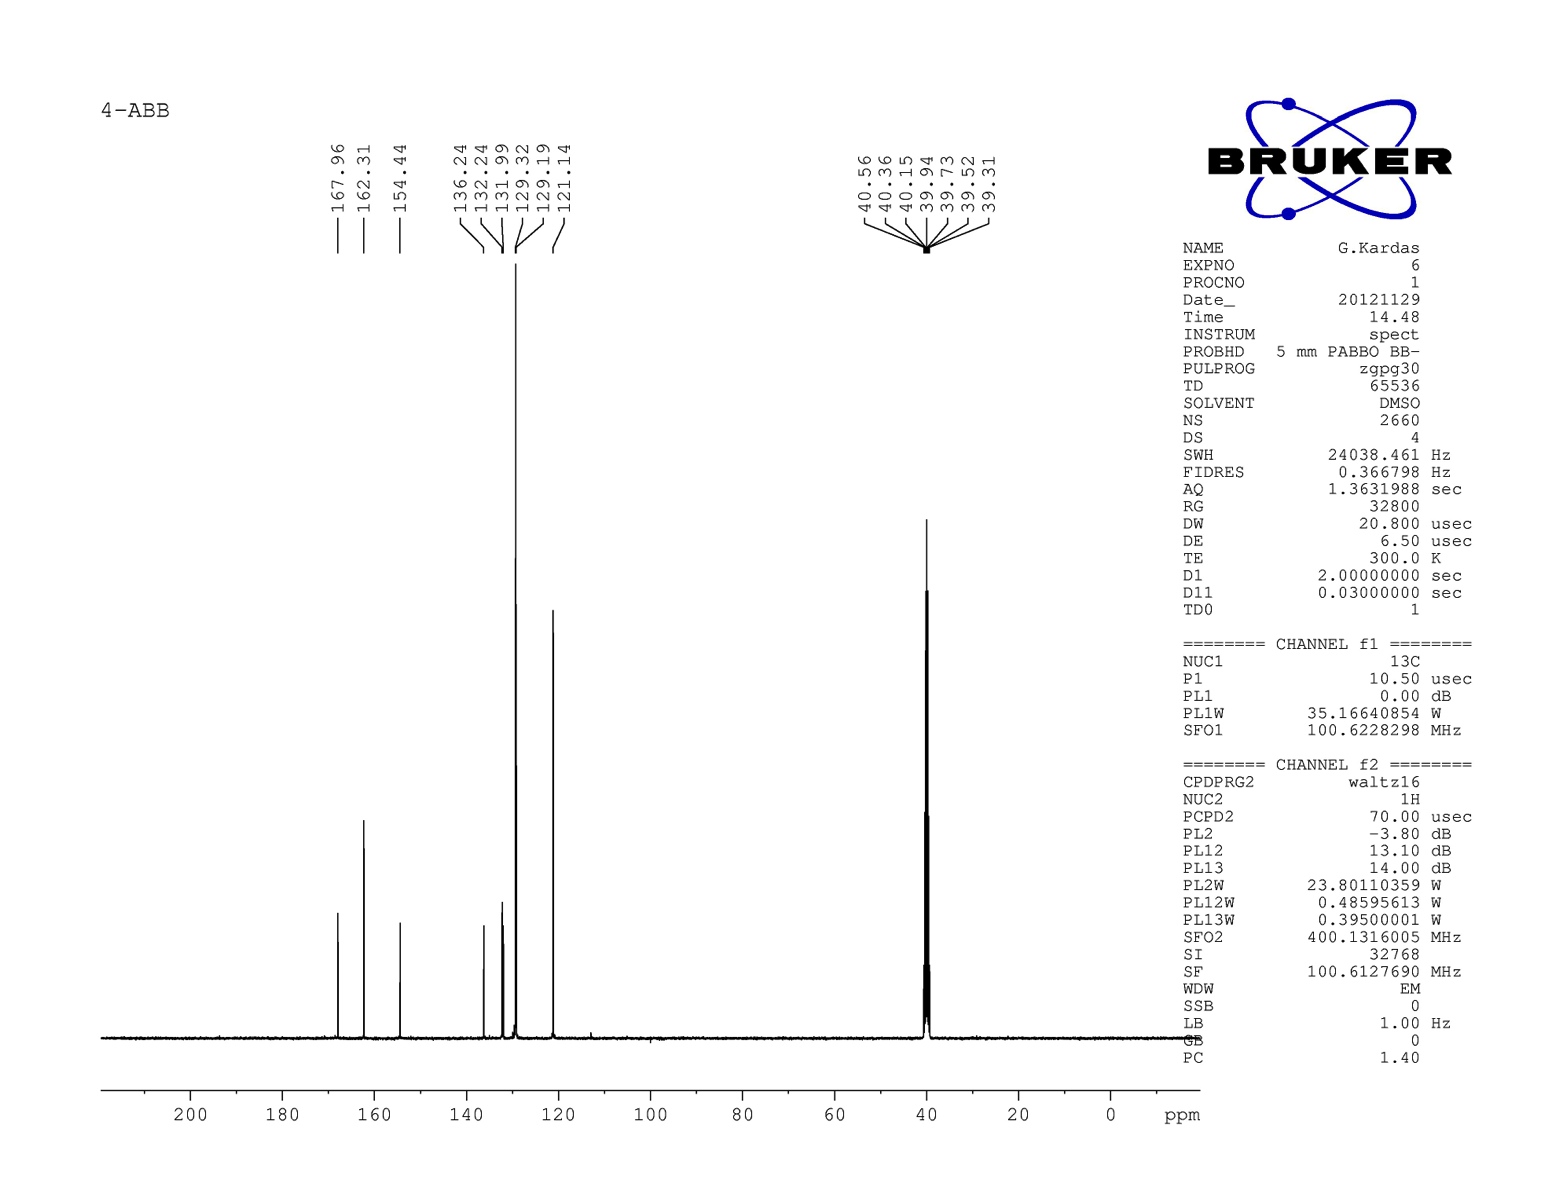


c

**Figure S2.** 13C NMR spectrums of 4-AB (a), BA (b) and 4-BAB (c)


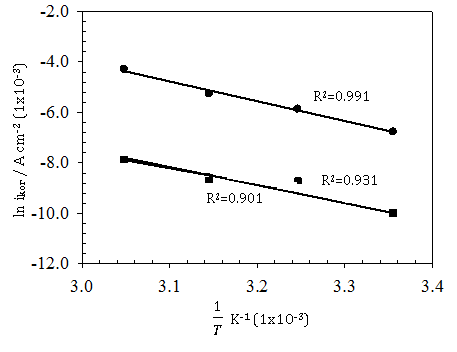


Figure S3. Arrhenius plots of MS in 1.0 M HCl solution without (**●**) with the addition of 10 mM 4-BAB (**■**)
